# Supplementary material for: Eligibility for Human Leukocyte Antigen–Based Therapeutics by Race and Ethnicity
Source: PubMed Central journal article supplement (PMC10603498; doi:10.1001/jamanetworkopen.2023.38612), 2023-10-26
Supplement: jamanetwopen-e2338612-s001.pdf [file jamanetwopen-e2338612-s001.pdf]

## Supplementary Online Content

Olivier T, Haslam A, Tuia J, Prasad V. Eligibility by Race and Ethnicity for Human Leukocyte Antigen–Based therapeutics. *JAMA Netw Open*. 2023;6(10):e2338612. doi:10.1001/jamanetworkopen.2023.38612

**eTable.** Tumor Types, According to the Mechanism of Action Under Investigation, in Selected Trials Studying an Anticancer Therapy (n=258)

**eFigure.** Flowchart of the Trial Selection Process and Reasons for Exclusion

This supplementary material has been provided by the authors to give readers additional information about their work.

**eTable.** Tumor Types, According to the Mechanism of Action Under Investigation, in Selected Trials Studying an Anticancer Therapy (n=258)

|                            | <b>Cellular Therapy</b> | <b>Fusion Protein</b> | <b>Other</b> | <b>Vaccine Therapy</b> | <b>Total</b>   |
|----------------------------|-------------------------|-----------------------|--------------|------------------------|----------------|
|                            | <b>(N=71)</b>           | <b>(N=8)</b>          | <b>(N=3)</b> | <b>(N=176)</b>         | <b>(N=258)</b> |
| <b><u>Tumor type</u></b>   |                         |                       |              |                        |                |
| Central Nervous System     | 1 (1.4%)                | 0 (0%)                | 0 (0%)       | 16 (9.1%)              | 17 (6.6%)      |
| Cervical Cancer            | 1 (1.4%)                | 0 (0%)                | 0 (0%)       | 0 (0%)                 | 1 (0.4%)       |
| Esophageal Cancer          | 2 (2.8%)                | 0 (0%)                | 0 (0%)       | 4 (2.3%)               | 6 (2.3%)       |
| Head and Neck              | 3 (4.2%)                | 1 (12.5%)             | 0 (0%)       | 1 (0.6%)               | 5 (1.9%)       |
| Heme Malignancies          | 9 (12.7%)               | 0 (0%)                | 1 (33.3%)    | 12 (6.8%)              | 22 (8.5%)      |
| Kidney Cancer              | 1 (1.4%)                | 0 (0%)                | 0 (0%)       | 2 (1.1%)               | 3 (1.2%)       |
| Liver Cancer               | 4 (5.6%)                | 0 (0%)                | 0 (0%)       | 2 (1.1%)               | 6 (2.3%)       |
| Many Tumor Types           | 25 (35.2%)              | 4 (50.0%)             | 0 (0%)       | 14 (8.0%)              | 43 (16.7%)     |
| Melanoma                   | 10 (14.1%)              | 3 (37.5%)             | 0 (0%)       | 54 (30.7%)             | 67 (26.0%)     |
| Non-Small Cell Lung Cancer | 2 (2.8%)                | 0 (0%)                | 2 (66.7%)    | 13 (7.4%)              | 17 (6.6%)      |
| Other                      | 3 (4.2%)                | 0 (0%)                | 0 (0%)       | 1 (0.6%)               | 4 (1.6%)       |
| Ovarian Cancer             | 4 (5.6%)                | 0 (0%)                | 0 (0%)       | 5 (2.8%)               | 9 (3.5%)       |
| Pancreatic Cancer          | 1 (1.4%)                | 0 (0%)                | 0 (0%)       | 6 (3.4%)               | 7 (2.7%)       |
| Sarcoma                    | 5 (7.0%)                | 0 (0%)                | 0 (0%)       | 0 (0%)                 | 5 (1.9%)       |
| Bladder Cancer             | 0 (0%)                  | 0 (0%)                | 0 (0%)       | 1 (0.6%)               | 1 (0.4%)       |
| Breast Cancer              | 0 (0%)                  | 0 (0%)                | 0 (0%)       | 23 (13.1%)             | 23 (8.9%)      |
| Colorectal Carcinoma       | 0 (0%)                  | 0 (0%)                | 0 (0%)       | 5 (2.8%)               | 5 (1.9%)       |
| Gastric Cancer             | 0 (0%)                  | 0 (0%)                | 0 (0%)       | 4 (2.3%)               | 4 (1.6%)       |
| Prostate Cancer            | 0 (0%)                  | 0 (0%)                | 0 (0%)       | 11 (6.3%)              | 11 (4.3%)      |
| Renal Cell Carcinoma       | 0 (0%)                  | 0 (0%)                | 0 (0%)       | 1 (0.6%)               | 1 (0.4%)       |
| Small Cell Lung Cancer     | 0 (0%)                  | 0 (0%)                | 0 (0%)       | 1 (0.6%)               | 1 (0.4%)       |

**eFigure.** Flowchart of the Trial Selection Process and Reasons for Exclusion

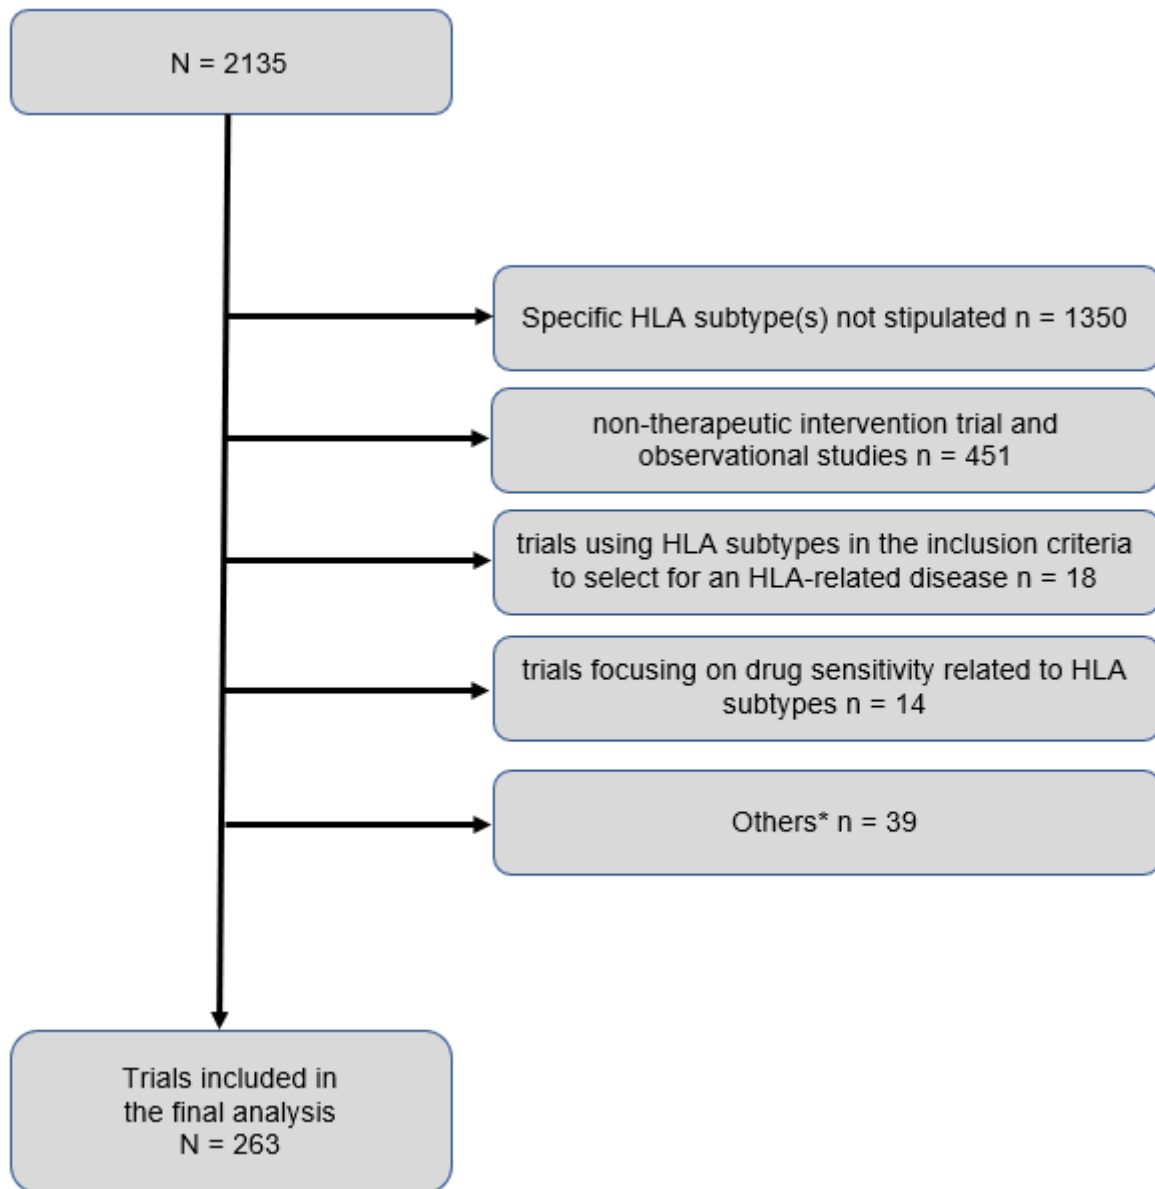

\* Among those: 34 trials studied HLA as a biomarker, 2 referred to HLA as hyaluronic acid, and 3 others had no relation with classical HLA subtypes.
