# Supplementary material for: Eligibility for Human Leukocyte Antigen–Based Therapeutics by Race and Ethnicity
Source: PubMed Central journal article supplement (PMC10603498; doi:10.1001/jamanetworkopen.2023.38612), 2023-10-26
Supplement: jamanetwopen-e2338612-s002.pdf [file jamanetwopen-e2338612-s002.pdf]

## Data Sharing Statement

Olivier. Eligibility for Human Leukocyte Antigen–Based Therapeutics by Race and Ethnicity. *JAMA Netw Open*. Published October 26, 2023. doi:10.1001/jamanetworkopen.2023.38612

### Data

**Data available:** Yes

**Data types:** Other (please specify)

**Additional Information:** All data on which this work was based are publicly available. The data generated during the study are available upon reasonable request from the corresponding author.

**How to access data:** From the corresponding author ([timothee.olivier@hcuge.ch](mailto:timothee.olivier@hcuge.ch))

**When available:** With publication

### Supporting Documents

**Document types:** Other (please specify)

**Additional Information:** Spreadsheet of the data generated.

**How to access documents:** From the corresponding author ([timothee.olivier@hcuge.ch](mailto:timothee.olivier@hcuge.ch))

**When available:** With publication

### Additional Information

**Who can access the data:** Anyone requesting the data.

**Types of analyses:** For any purpose.

**Mechanisms of data availability:** From [timothee.olivier@hcuge.ch](mailto:timothee.olivier@hcuge.ch), spreadsheet of the data generated.
